# Supplementary material for: Blockade of STAT3/IL-4 overcomes EGFR T790M-cis-L792F-induced resistance to osimertinib via suppressing M2 macrophages polarization
Source: PubMed Central journal article supplement — eBioMedicine. 2022 Aug 3;83:104200. doi: 10.1016/j.ebiom.2022.104200 (PMC9358434; doi:10.1016/j.ebiom.2022.104200), 2022-08-03

# Supplementary Figure S1

## patient 1

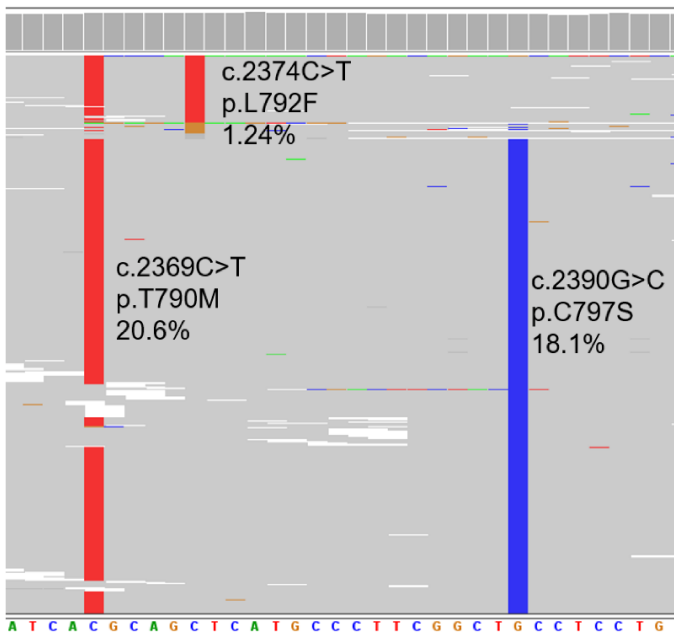

## patient 2

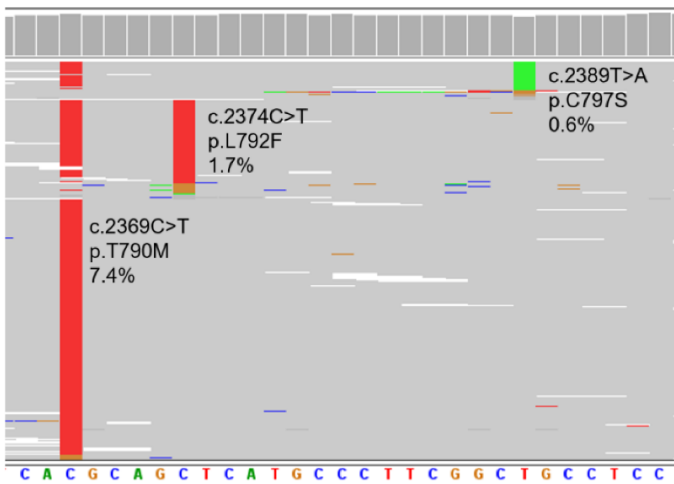

## patient 3

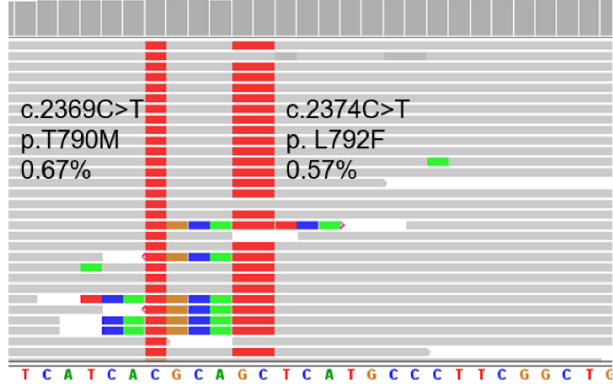

## patient 4

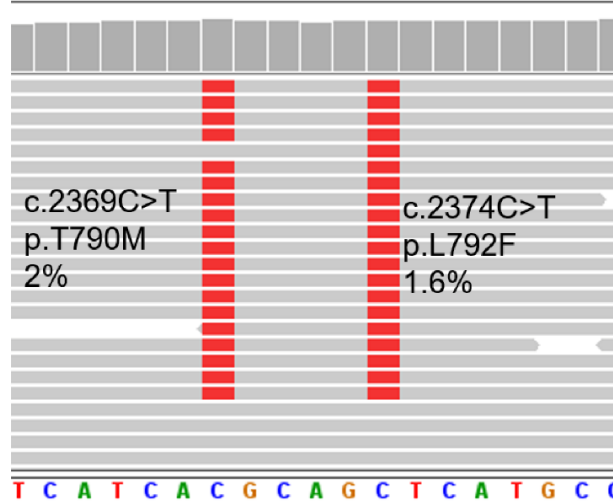

## patient 5

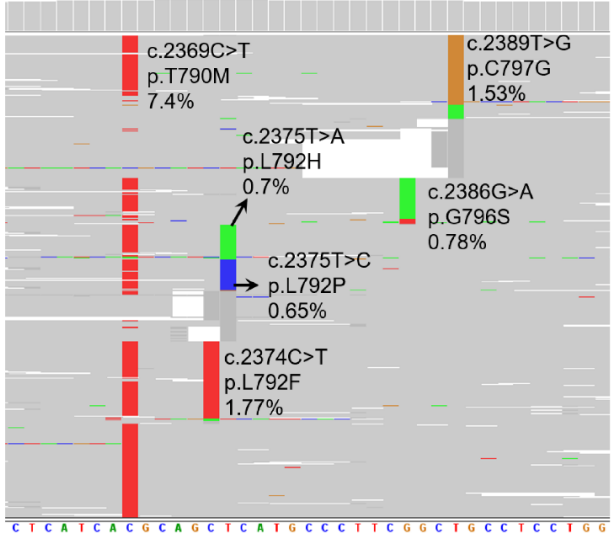

# Supplementary Figure S2

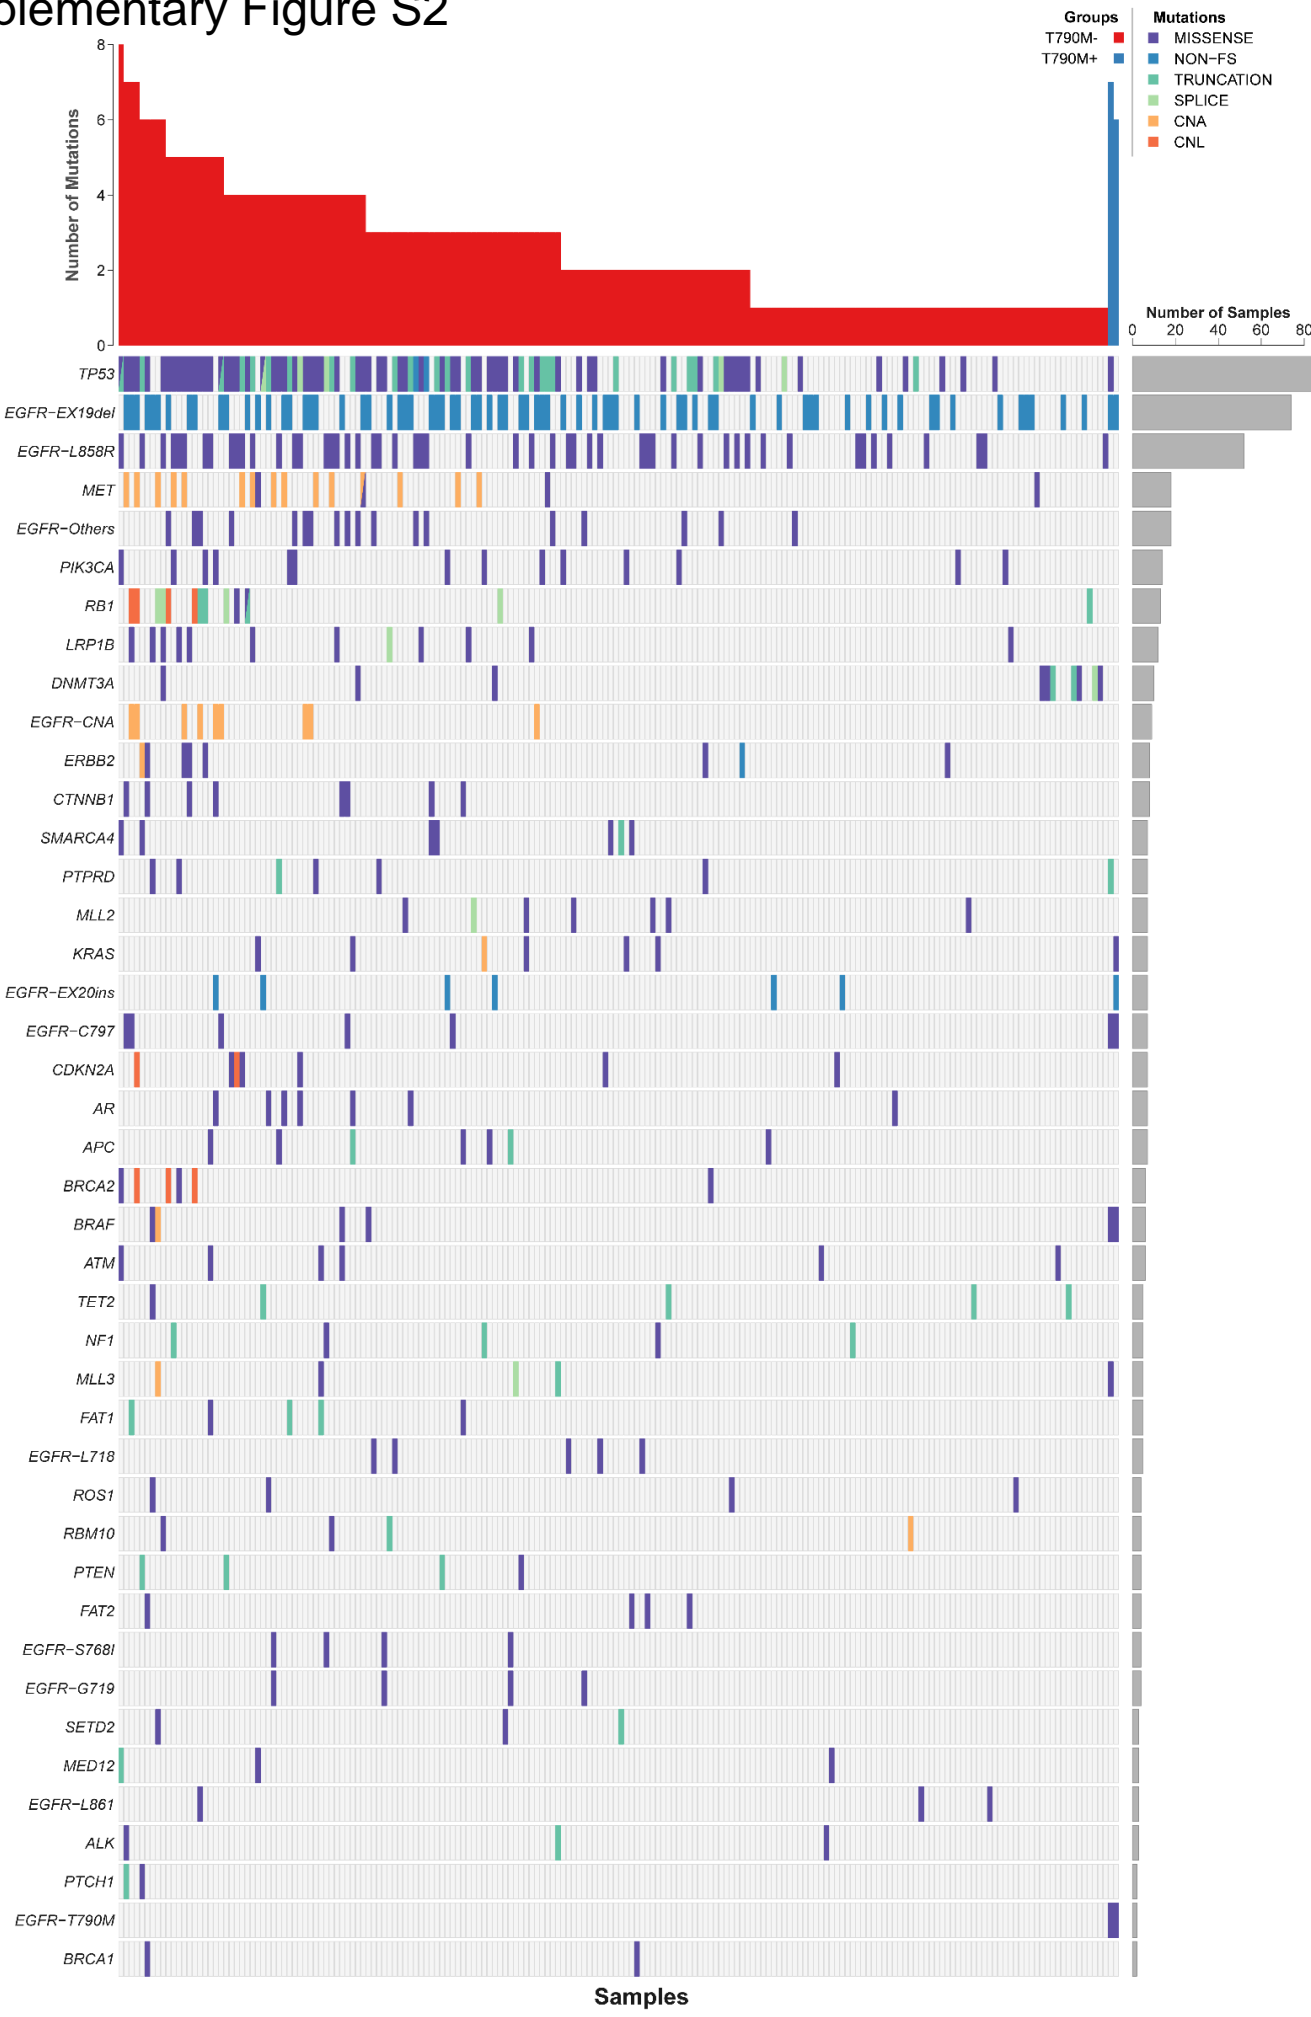

# Supplementary Figure S3

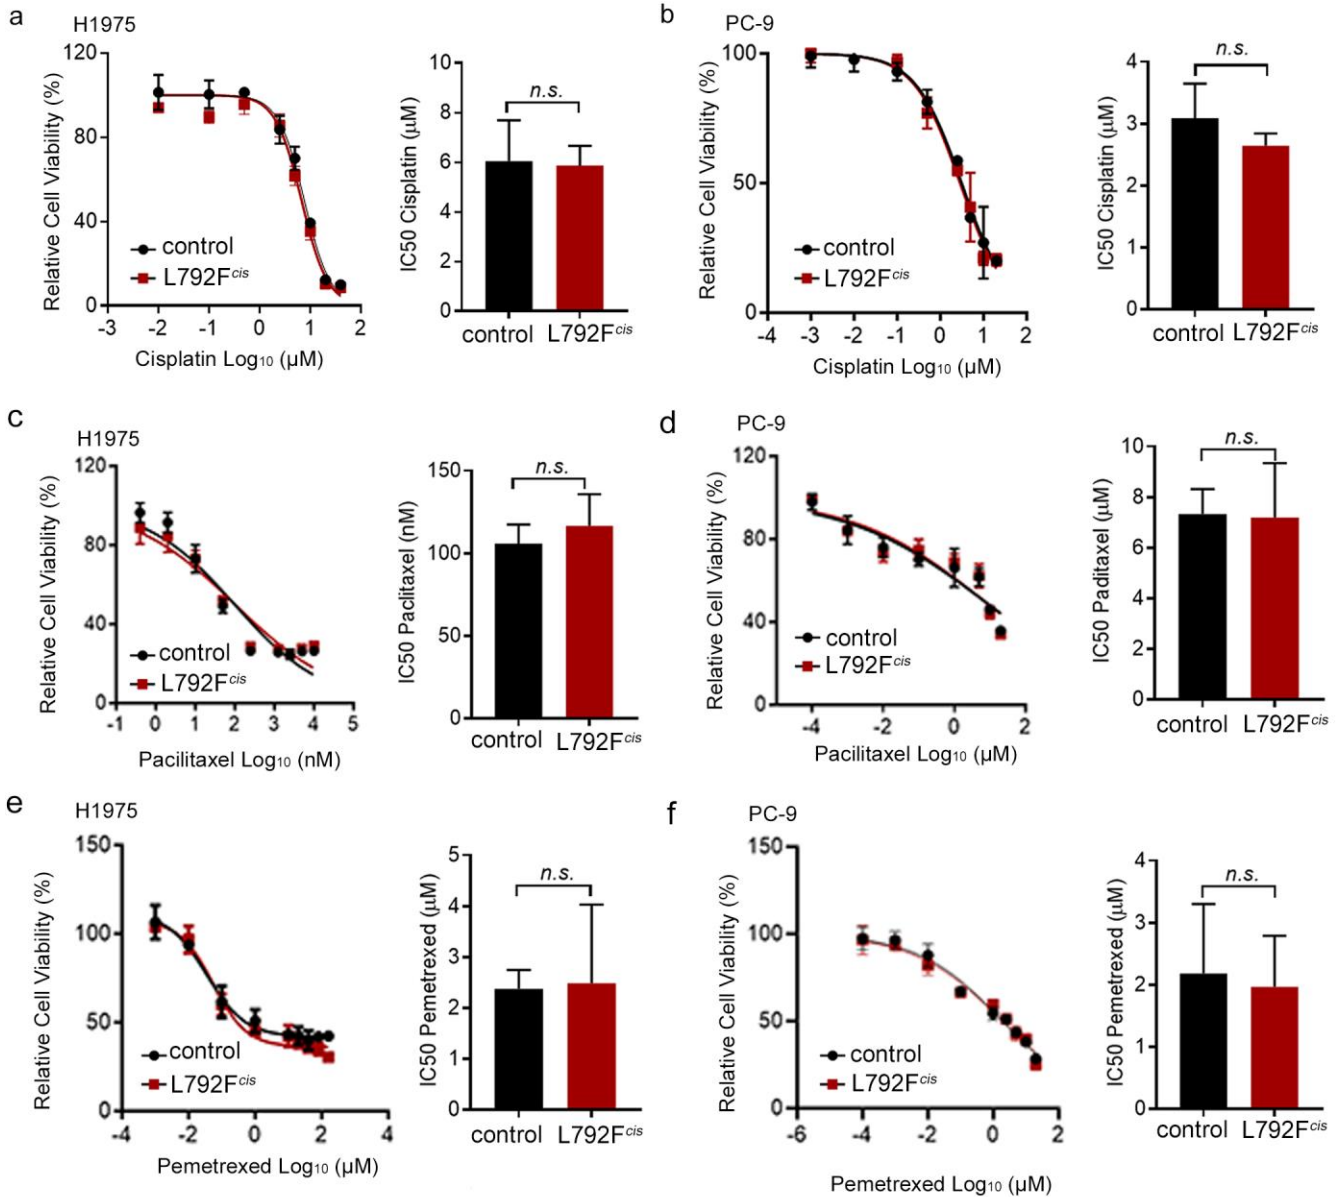

# Supplementary Figure S4

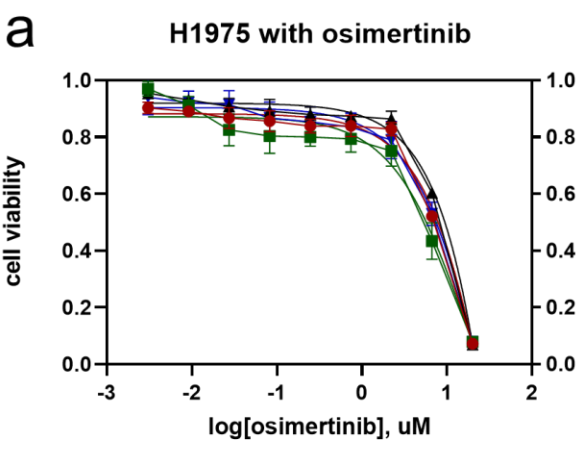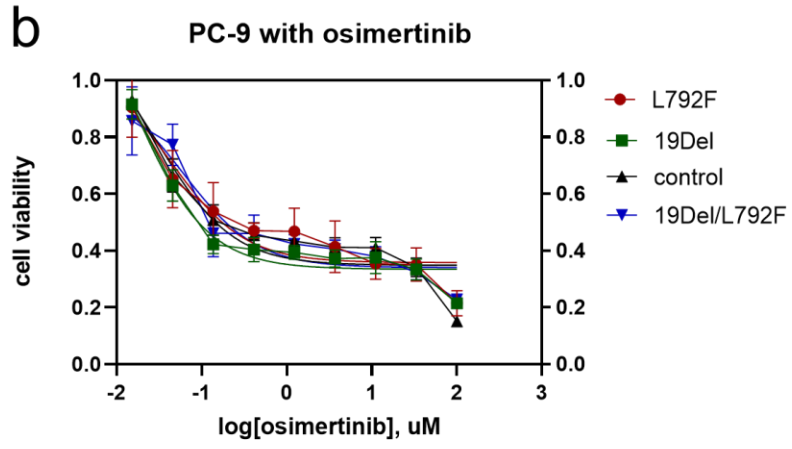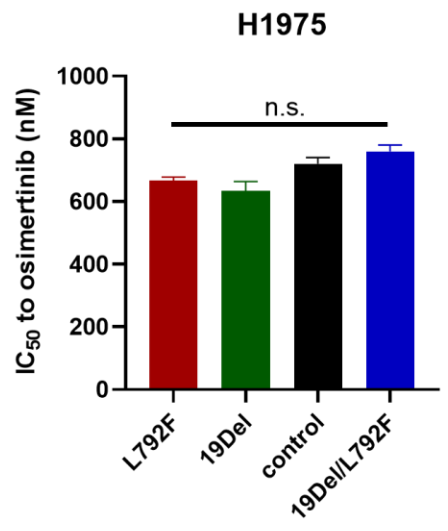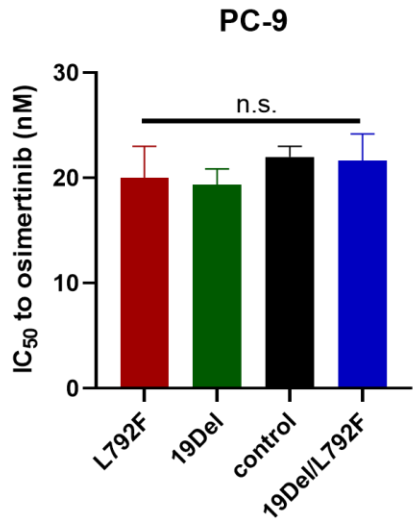

# Supplementary Figure S5

**a** Single cell dataset GEO: GSE160244  
PC9 xenograft tumors with Osimertinib

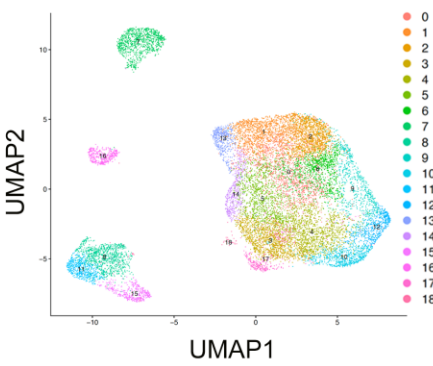

**b** ● Cancer cells (0-6,9,10,12-14,17,18)  
● Fibroblasts (active) (8,11)  
● Fibroblasts (inactive) (15)  
● Macrophages (7)  
● Leukocyte cells (16)

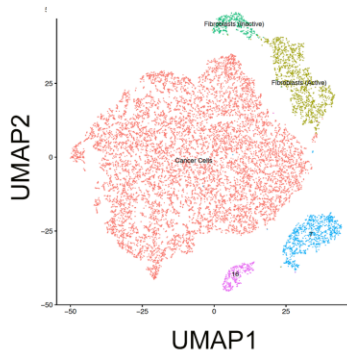

**c** Control Osimertinib

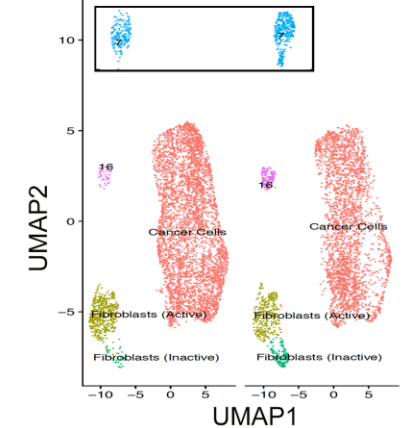

**d** Color Key and Histogram  
Drug perturbations signal  
Row Z-Score

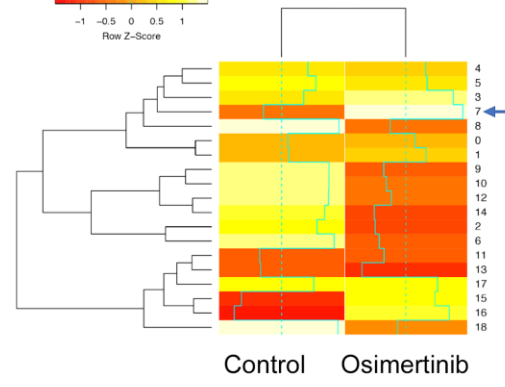

**e** ● Cancer cells  
● Fibroblasts (active)  
● Fibroblasts (inactive)  
● Macrophages  
● Leukocyte cells  
Average  
Percent

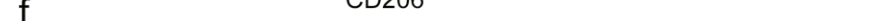

**f** Top 20 pathways enriched  
-log10(P)

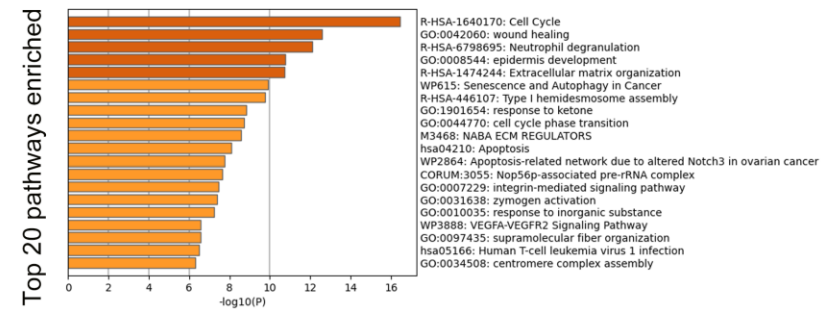

# Supplementary Figure S6

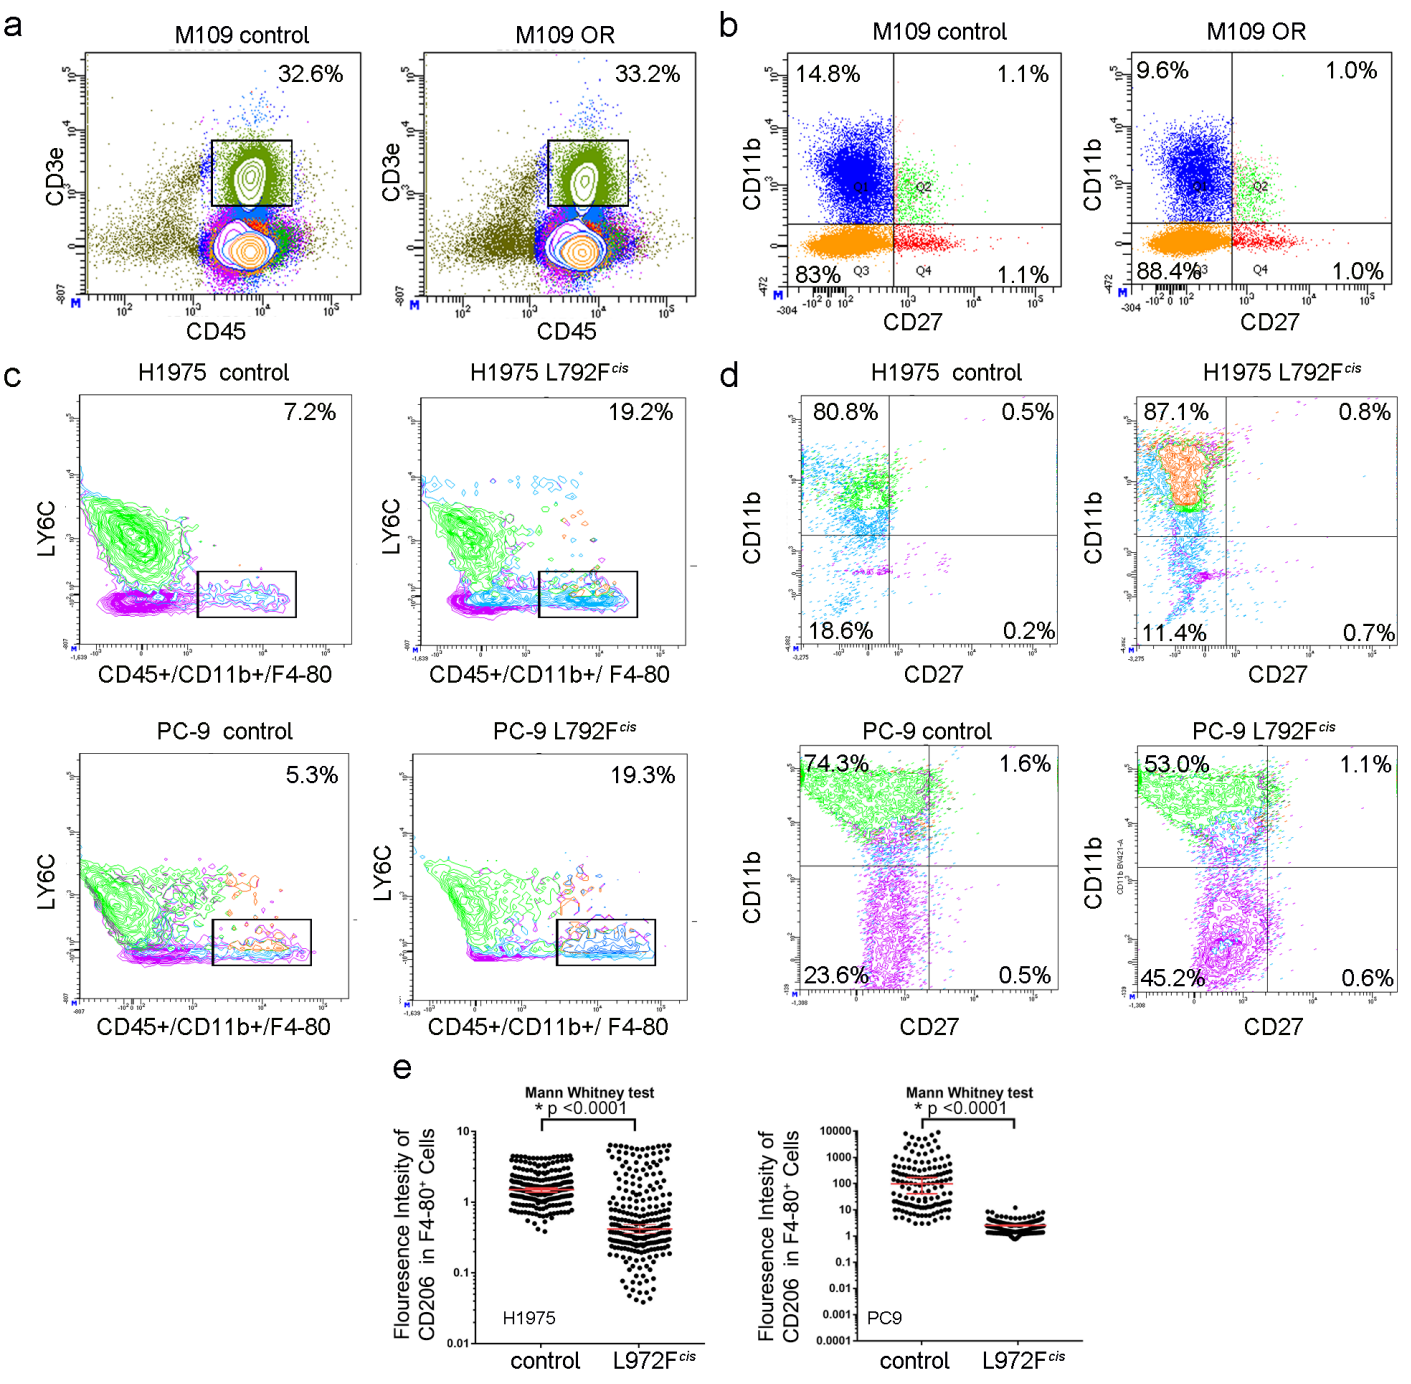

# Supplementary Figure S7

## MCL clusters

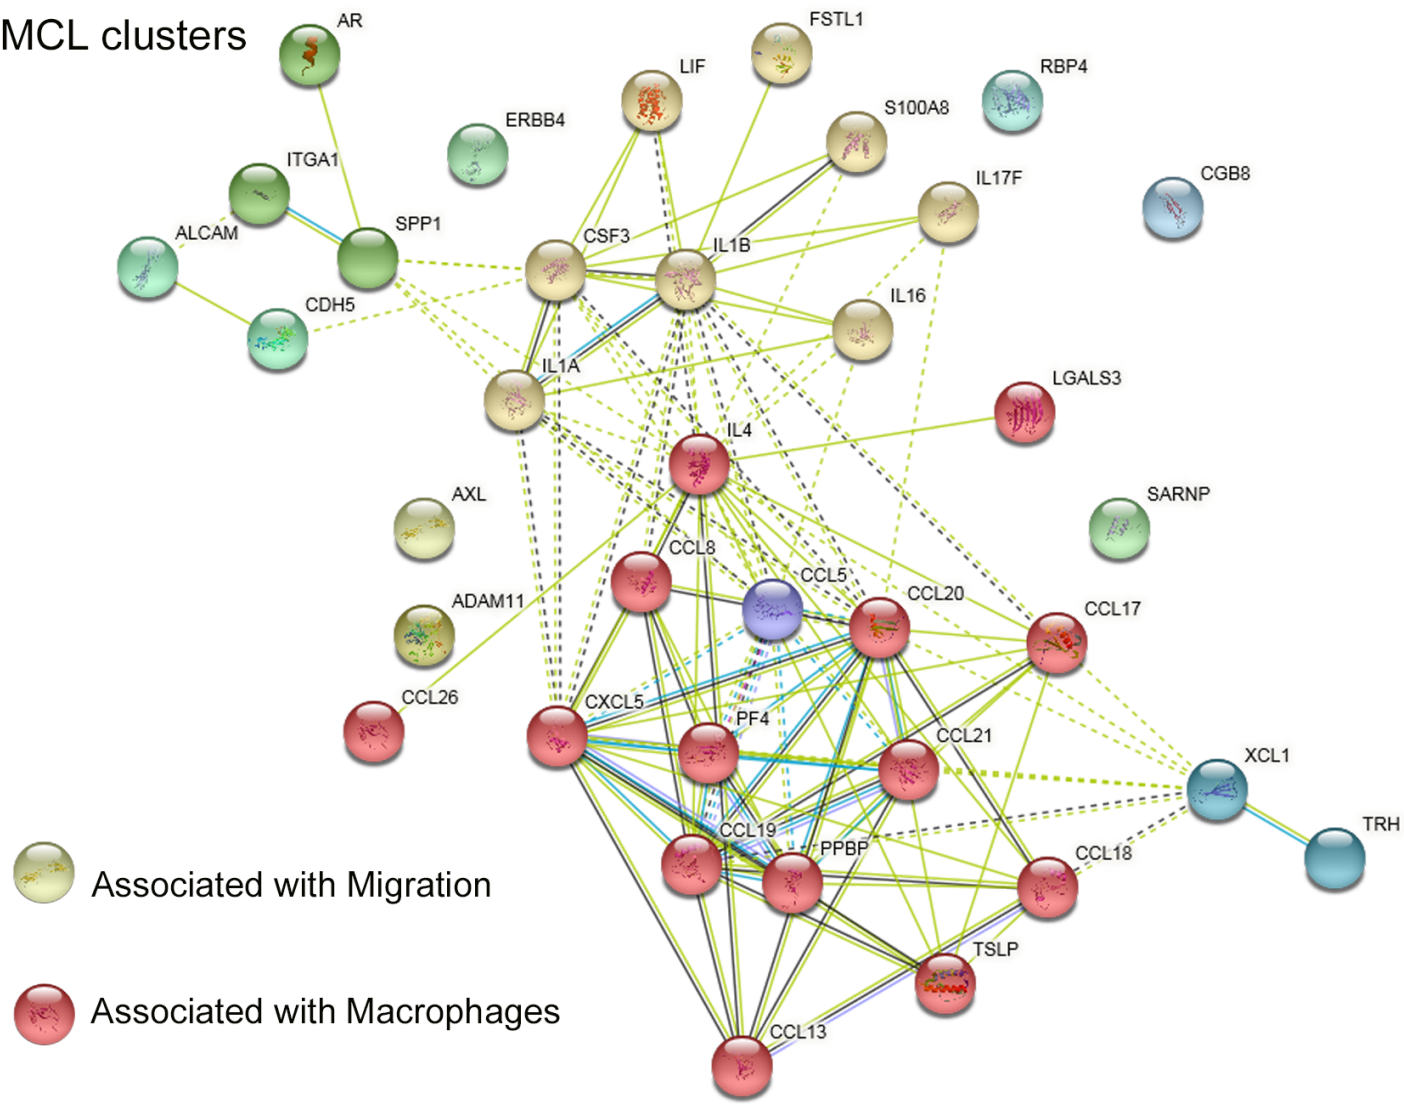

Supplement: mmc2.pdf [file mmc2.pdf]
